## Decrease in Hospitalizations for COVID-19 after Mask Mandates in 1083 U.S. Counties

<sup>1,2</sup>Dhaval Adjudah, <sup>1</sup>Karthik Dinakar, <sup>3</sup>Samuel P. Fraiberger, <sup>4</sup>George W. Rutherford, <sup>4</sup>David V. Glidden, <sup>5</sup>Monica Gandhi

<sup>1</sup>Massachusetts Institute of Technology, Media Lab, Cambridge, MA

<sup>2</sup>Center of Complex Interventions, Inc., Boston, MA

<sup>3</sup>Development Data Group, World Bank, Washington, DC

<sup>4</sup>Department of Epidemiology and Biostatistics, University of California, San Francisco (UCSF)

<sup>5</sup>Division of HIV, Infectious Diseases, and Global Medicine, Department of Medicine, University of California, San Francisco (UCSF)

**Withdrawal:** The authors have withdrawn this manuscript because there are increased rates of SARS-CoV-2 cases in the areas that we originally analyzed in this study. New analyses in the context of the third surge in the United States are therefore needed and will be undertaken directly in conjunction with the creators of the publicly-available databases on cases, hospitalizations, testing rates. Etc. We will be performing this in conjunction with machine learning experts at UCSF. Therefore, the authors do not wish this work to be cited as reference for the project. We hope to have an updated analysis using data from the 2<sup>nd</sup> and now 3<sup>rd</sup> wave of SARS-CoV-2 in this country soon. If you have any questions, please contact the corresponding author.

**Conflict of interests:** The authors have no financial conflicts of interest to report

**Corresponding author:**

Monica Gandhi MD, MPH

Professor of Medicine, Division of HIV, Infectious Diseases and Global Medicine

Medical Director, Ward 86 HIV Clinic

995 Potrero Avenue, 4<sup>th</sup> floor

San Francisco, CA 94110

[Monica.gandhi@ucsf.edu](mailto:Monica.gandhi@ucsf.edu)

**Key words:** Universal masking, mask mandates, SARS-CoV-2, COVID-19, viral inoculum, hospitalization rates, U.S. counties
